# Supplementary material
Source: publisher site journal article supplement (https://www.dovepress.com/article/223417)
Supplement: Supplementary file 1 [file get_supplementary_file.php]

1. A
2. B
3. C
4. D
5. E
6. F
7. G
8. H
9. I
10. J
11. K
12. L
13. M
14. N
15. O
16. P
17. Q
18. R

Figure S1: The correlation between the NICP (A), RFA (D), DPL (G), MRP14 (J), DICH (M), ADP (P) and Child-Pugh Score. The box plot of NICP (B), RFA (E), DPL (H), MRP14 (K), DICH (N), and ADP (Q) level in Child-Pugh A, Child-Pugh B and Child-Pugh C group and the ROC curve of NICP (C), RFA (F), DPL (I), MRP14 (L), DICH (O), and ADP (R). Mann-Whitney test showed a significant difference between Child-Pugh A and Child-Pugh B, Child-Pugh B and Child-Pugh C. The AUC of ROC curve showed that NICP, RFA, DPL, MRP14, DICH and ADP have good performance to distinguish Child-Pugh A from Child-Pugh B and Child-Pugh B from Child-Pugh C.



























A

B

C

D

E

F

G

H

I

J

K

L

Figure S2: Correlation between the cirrhosis system , components of the system and Child-Pugh score. The Child-Pugh score of each cirrhosis stage (A); Correlation between the New cirrhosis system (B), combination of RFA+DPL+MRP14 (C), combination of NICP+DPL+MRP14 (D), combination of NICP+RFA+MRP14 (E), combination of NICP+RFA+DPL (F), combination of NICP+RFA (G), combination of NICP+DPL (H), combination of NICP+MRP14 (I), combination of RFA+DPL (J), combination of RFA+MRP14 (K), combination of DPL+MRP14 (L) and Child-Pugh score in training group.



























A

E

I

B

C

D

F

G

H

J

K

L

Figure S3. ROC curve analysis of cirrhosis system and components of the system in the training group. (A) Cirrhosis system score of each Child-Pugh stage. (B-L) ROC curve of cirrhosis system (B), combination of RFA+DPL+MRP14 (C), combination of NICP+DPL+MRP14 (D), combination of NICP+RFA+MRP14 (E), combination of ICP+RFA+DPL (F), combination of NICP+RFA (G), combination of NICP+DPL (H), combination of NICP+MRP14 (I), combination of RFA+DPL (J), combination of RFA+MRP14 (K), and combination of DPL+MRP14 (L).


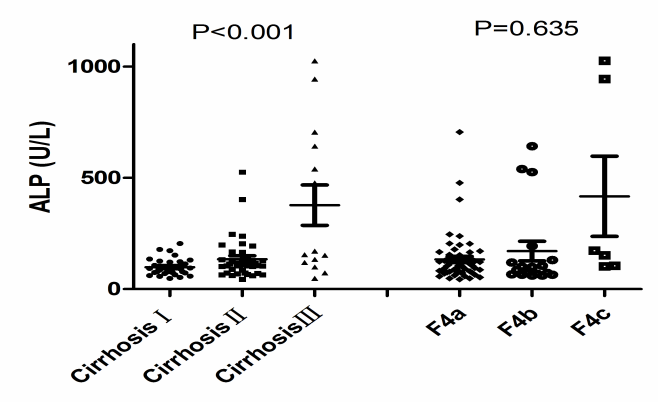

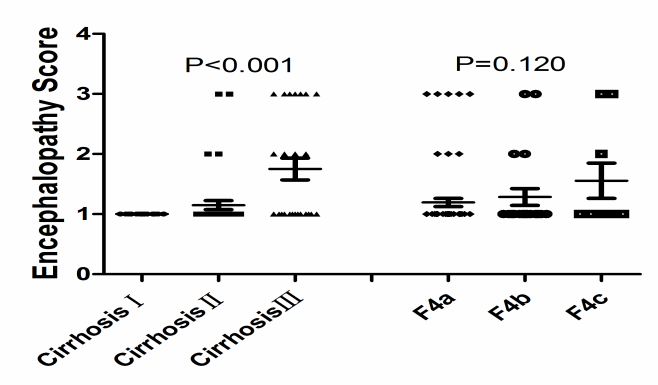

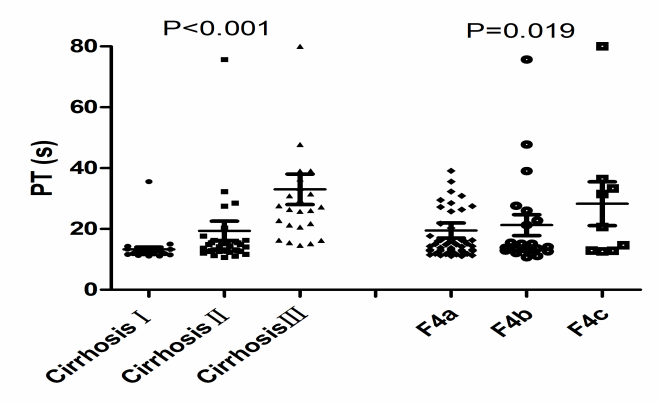

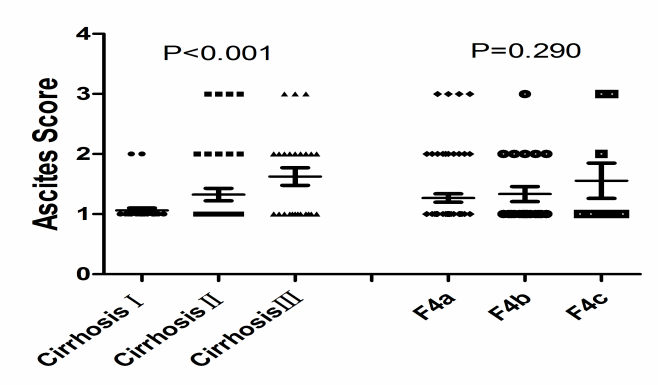

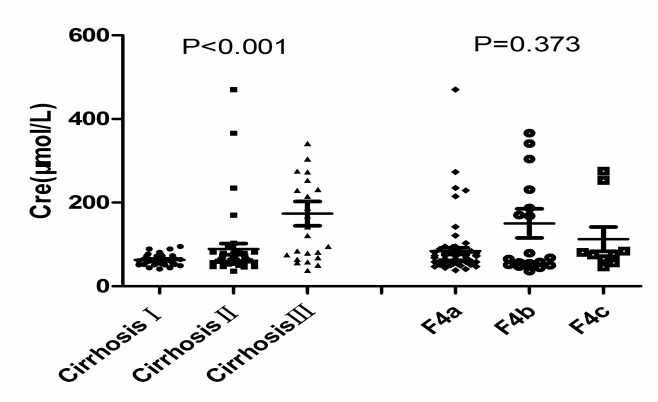



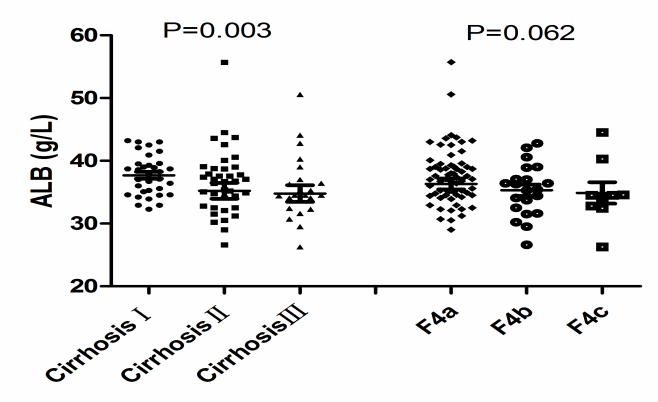

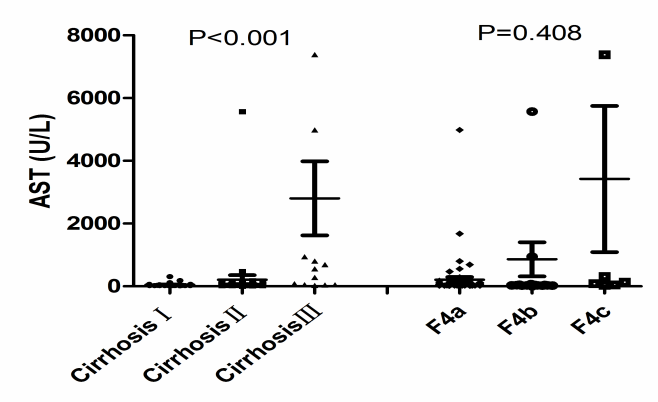

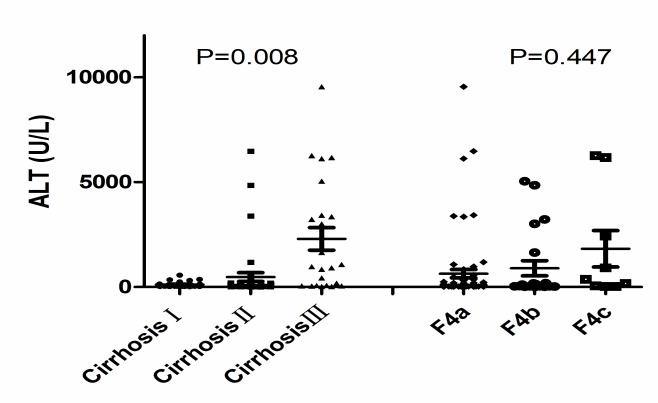

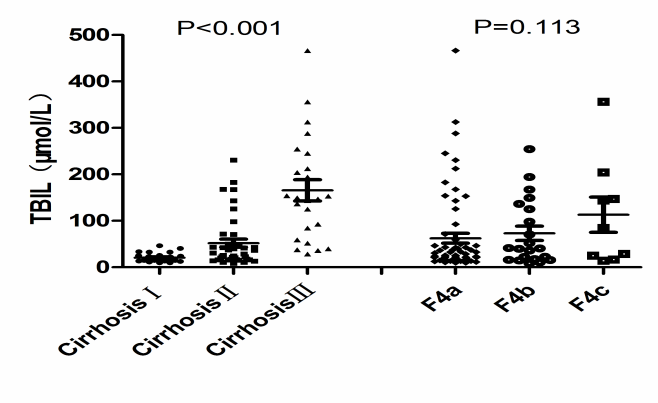


A

B

C

D

E

F

G

H

I

J

Figure S4: Correlation between the serum index and cirrhosis system score, Laennec fibrosis score in the testing group. Correlation between the TBIL (A), ALT (B), AST(C), ALB(D), ALP (E), A/G (F), PT (G), Cre (H) and cirrhosis system score, Laennec fibrosis score.




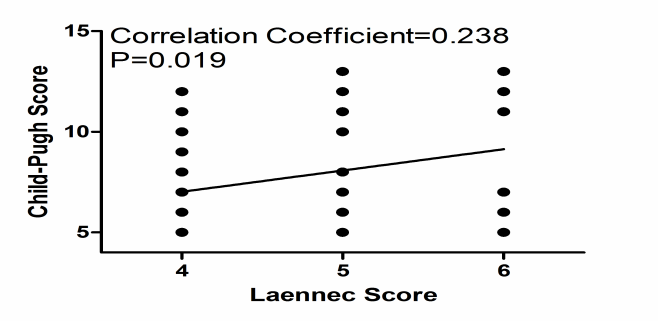














B

A

C

D

E

F

G

H

Figure S5: Correlation between Cirrhosis system, Laennec scoring system and liver function in testing group. The Child-Pugh score of each stage of New cirrhosis system and Laennec fibrosis scoring system (A), MELD score of each stage of cirrhosis and Laennec system (B). Correlation between Cirrhosis score and Child-Pugh score (C), and MELD Score (E). Correlation between cirrhosis Stage and Child-Pugh Stage (G). Correlation between Laennec and Child-Pugh score (D), MELD Score (F). Correlation between Laennec Stage and Child-Pugh Stage in testing group (H) in the testing group.































































1. A
2. B
3. C
4. D
5. E
6. F
7. G
8. H
9. I
10. J
11. K
12. L
13. M
14. N
15. O
16. P
17. Q
18. R
19. S
20. T
21. U
22. V
23. W
24. X
25. Z
26. AA
27. AB
28. AC
29. AD
30. Y

Figure S6: Correlation between the NICP and TBIL (A), ALT (B), AST (C), ALP (D), A/G (D), PT (F), Cre (G), Ascitic Score (H), Encephalopathy Score (I); correlation between the RFA and TBIL (J), ALT (K), AST (L), ALP (M), Cre (N); correlation between the DPL and TBIL (O), ALT (P), AST (Q), ALP (R), ALB (S), PT (T), Cre (U), Ascitic Score (V), Encephalopathy Score (W); correlation between the MRP14 and TBIL (X), ALT (Y), AST (Z), ALP (AA), PT (AB), Ascitic Score (AC), Encephalopathy's Score (AD) in the testing group.


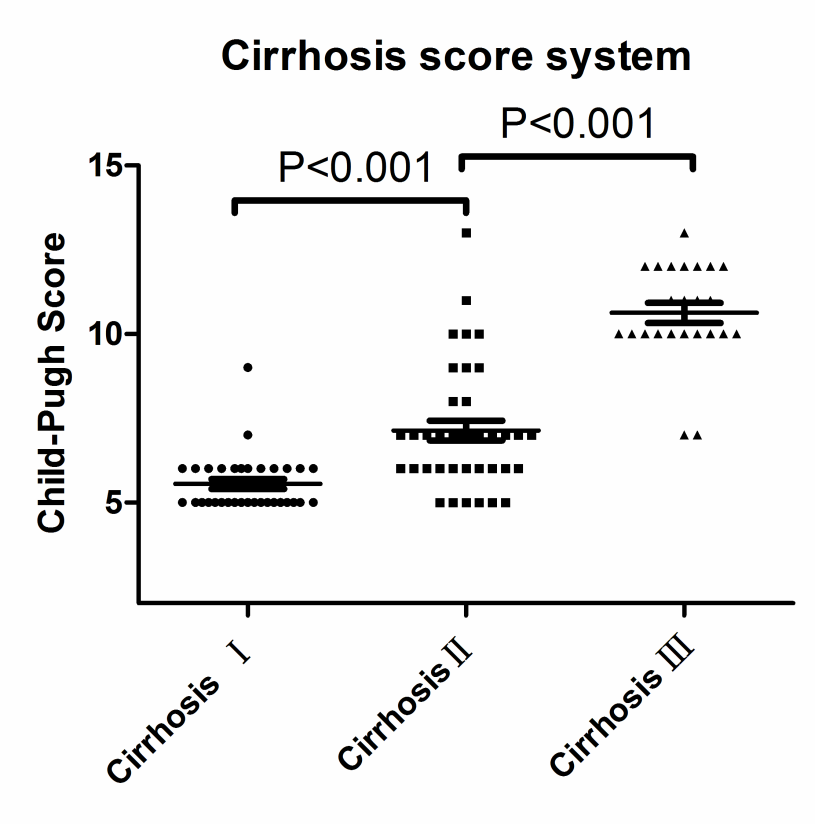

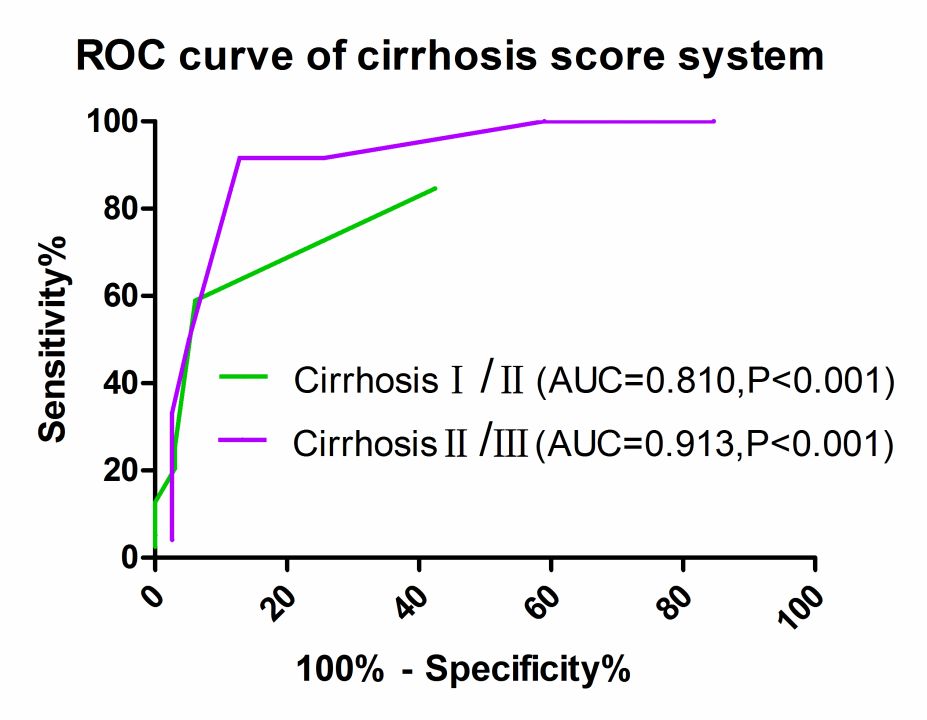


Figure S7 . ROC curve analysis of cirrhosis system in the testing group. (A) Cirrhosis system score of each Child-Pugh stage. (B) ROC curve of cirrhosis system .
